# Supplementary material for: Rosuvastatin and Cardiovascular Events in Patients Undergoing Hemodialysis
Source: Atypon-hosted journal article supplement (doi:10.1056/nejmoa0810177), 2009-03-30
Supplement: nejm_fellstrom_1395sa1.pdf [file nejm_fellstrom_1395sa1.pdf]

## Supplementary Appendix

This appendix has been provided by the authors to give readers additional information about their work.

Supplement to: Fellström BC, Jardine AG, Schmieder RE, et al. Rosuvastatin and cardiovascular events in patients undergoing hemodialysis. *N Engl J Med* 2009;360:1395-407. DOI: 10.1056/NEJMoa0810177.

(PDF updated June 30, 2009.)

Executive Steering Committee:

Professor B. Fellström (Principal Investigator; Uppsala, Sweden), Professor F Zannad (Toul, France), Professor R. E. Schmieder (Erlangen, Germany), Professor H. Holdaas (Oslo, Norway), Professor A. G. Jardine (Glasgow, UK). Dr E. Johnsson (Mölnadal, Sweden), Mr M. Gottlow (Mölnadal, Sweden).

Steering Committee:

*Executive Steering Committee members* plus Dr K. Bannister (Adelaide, Australia), Dr J. Beutler (Den Bosch, The Netherlands), Professor D. Chae (Kyounggi-do, South Korea), Professor S. M. Cobbe (Glasgow, UK), Professor C. Grönhagen-Riska (Helsinki, Finland), Dr J. De Lima (Sao Paulo, Brazil), Professor R. Lins (Antwerpen, Belgium), Dr A. McMahon (Edmonton, Canada), Professor G. Mayer (Innsbruck, Austria), Professor H-H. Parving (Copenhagen, Denmark), Dr A. Chevaile (San Luis, Potosí, Mexico), Professor G. Remuzzi (Bergamo, Italy), Dr O. Samuelsson (Göteborg, Sweden), Professor S. Sonkodi (Szeged, Hungary), Dr G. Süleymanlar (Antalya, Turkey), Dr D. Tsakiris (Veria, Greece), Professor V. Tesar (Prague, Czech Republic), Professor V. Todorov (Pleven, Bulgaria), Professor A. Wiecek (Katowice, Poland), Professor R. P. Wüthrich (Zürich, Switzerland).

Data and Safety Monitoring Board:

Professor H. Dargie (Chair; Glasgow, UK), Professor E. Ritz (Heidelberg, Germany), Professor H. Wedel (Göteborg, Sweden), Professor A. H. Zwinderman (Amsterdam, The Netherlands).

Clinical End Point Committee:

Dr A. Brady (Glasgow, UK), Professor S. M. Cobbe (Chair; Glasgow, UK), Dr C. Deighan (Glasgow, UK), Professor P. Macfarlane (Glasgow, UK), Professor D. Stott (Vice-Chair; Glasgow, UK).

Participating Investigators and Centers:

**Australia**, *John Hunter, Medicine Division, NSW* – A. Gillies, S. Carney; *Royal Adelaide Hospital, Adelaide, SA* – K. Bannister, R. Faull; *Liverpool Hospital, NSW* – M. Suranyi; *Pine Rivers Private Hospital, QLD* – D. Saltissi; *Nephrology Austin Hospital, VIC* – M. Fraenkel, P. Mount; *Royal Perth Hospital, WA* – A. Irish, D. Chan, S. Dogra, S. Wei; *William St, Gosford, NSW* – S. Roger; *Royal North Shore Hospital, NSW* – C. Pollock, B. Cooper; *Monash Medical Centre, Nephrology, VIC* – F. Brown; *Royal Brisbane Hospital, QLD* – H. Healy; *SCG Hospital, WA* – B. Hutchinson, N. Boudville, S. Senaratne, J. Luxton; *Queen Elizabeth Hospital, SA* – A. Disney, G. Russ; *Princess Alexandra Hospital, QLD* – N. Isbel,

D. Johnson, J. Wong, K. Herzig; *Royal Melbourne Hospital, Nephrology, VIC* – R. Walker, M. Leikis, R. Masterson, V. Perkovic. **Austria**, *KH der barmherzigen Schwestern, Wels* – R. Kramar; *KH der Elizabethinen, Linz* – B. Robl, H-K. Stummvoll; *Medizinische Univ. Klinik, Graz* – H. Holzer; *Lainz, 1 Med. Abt., Vienna* – R. Prager; *KH der Stadt Wien Rudolfstiftung, Vienna* – H. Graf; *Landeskrankenhaus, Feldkirch-Tisis* – U. Neyer; *Univ. Klinik f. Innere Medizin IV, Innsbruck* – G. Mayer; *Wilhelminenspital der Stadt Wien, Vienna* – J. Kovarik; *KH St. Poelten* – P. Balcke. **Belgium**, *ZNA Stuivenberg, Antwerp* – R. Lins, I. Muyshondt; *U.Z. Gasthuisberg, Leuven* – K. Claes, B. Maes; *UCL Saint-Luc, Brussels* – M. Jadoul, P. Dupont, M. Marchal, Y. Pirson; *Centre Hospitalier Régional de la Citadelle, Liège* – P. Cambier, M. Robin, X. Warling; *Clinique Universitaire Bruxelles Hôpital Erasme, Brussels* – C. Tielemans; *Centre Hospitalier Universitaire Tivoli, La Louvière* – P. Dupont, M. Marchal; *Universitair Ziekenhuis Brussel, Brussels* – P. Van Der Niepen; *O.L.V. Ziekenhuis, Aalst* – B. Van Vlem, J-M. Billiouw, J. De Meester; *Centre Hospitalier Universitaire Sart Tilman, Liège* – J-M. Krzesinski, B. Dubois, P. Delanaye. **Brazil**, *Instituto do Coracao, São Paulo* – J. De Lima, L. Gowdak; *Universidade Federal de São Paulo, São Paulo* – A. Barbosa, P. Abreu, C. Balda, M. E. Canziani, R. Watanabe; *Hospital Santa Marcelina, São Paulo* – R. Barata, N. Lisboa, R. Vilarinho; *Hospital Universitário Cajuru, Curitiba* – R. Pecoits, P. Teixeira, P. Fortes. **Bulgaria**, *MHAT 'Alexandrovská', Haemodialysis Clinic, Sofia* – Z. Kraev, A. Koteva, M. Georgiev; *MHAT 'Queen Joanna', Haemodialysis Clinic, Sofia* – S. Krivoshev, A. Popov, T. Baldev, G. Terziiska; *5th MHAT, Haemodialysis Clinic, Sofia* – R. Rangelov, D. Ekova, L. Vitanova, V. Mitova, N. Videnova; *MHAT, Haemodialysis Clinic, Pleven* – V. Todorov, B. Dimitrova, D. Dosev, V. Vasileva; *MHAT 'St. Georgi', Haemodialysis, Plovdiv* – D. Dimitrakov, B. Blagov, D. Nikolov, E. Tilkijan, E. Kapon, P. Stavrev, N. Guncheva; *MHAT, Haemodialysis Clinic, Plovdiv* – P. Paunova, B. Tashkov, D. Bojadziev, G. Popova; *National Heart Hospital, Haemodialysis, Sofia* – I. Delibaltov, M. Markov, N. Koleva, M. Petrova. **Canada**, *Humber River Regional Hospital, York, ON* – M. Berall, A. Pierratos, D. Mendelssohn, G. Hercz; *Foothills Hospital, Calgary, AB* – E. Burgess; *Hopital Charles-Lemoyne, Greenfield Park, QC* – S. Cournoyer, C. Giroux, G. Soltys, L. Savoie, S. Brunet, V. Begin; *Vancouver General Hospital Jim Pattison Pavilion, Vancouver, BC* – J. Duncan, C. Yeung, E. Cameron, J. Jastrzebski, J. Shapiro, M. Copland, P. Keown, R. Singh; *Business Building, Kitchener, ON* – S. Jolly, S. Mustata; *Interior Clinical Research Consultants Ltd. Research Centre, Kelowna, BC* – D. Kates; *St Pauls Hospital, Vancouver, BC* – B. Jung, A. Jamal, A. Levin, A. Chiu, C. Chan-Yan, D. Landsberg, J. M. Macrae, J. Gill, L. De Luca, M. Kiaii, P. Taylor; *Centre Hospitalier Regional de Trois-Rivieres, Trois-Rivieres, QC* – F. Lambert, J. Berrard, J. Youmbissi, M. Bessette, R. Turcot, V. Moreau; *Hopital General Juif, Montreal, QC* – M. Davidman, D. Bencovitch, G. Frisch, M. Lipman; *University Hospital, Edmonton, AB* – A. McMahon, N. Pannu, S. Davison, S. Gourishankar; *London Health Sciences Centre, London, ON* – F. Rehman, N. Muirhead, A. House, F. Rehman, N. Boudville; *Clin/Med/Maisonneuve-Rosemount, Montreal, QC* – V. Pichette, M. Leblanc; *Cite de la Sante de Laval, Laval, QC* – L. Prud'Homme, J. Marcotte, M-H. Desjardins,

M. Raymond, R. Tremblay; *Clinical Studies Research Centre, Toronto, ON* – R. Richardson, C. Chan; *Atlantic Health Science Corp, Saint John, NB* – P. Sohi, C. Pippy, N. Gogan, S. Handa; *QEII HSC, Halifax, NS* – S. Soroka, D. Hirsh, R. Panek, T. Keough-Ryan; *Nephrology Associates, Scarborough, ON* – R. Ting, J. Fung, P. Ng, P. Tam, S. Chow; *Health Sciences Centre, Winnipeg, MB* – J. Zacharias; *Credit Valley Professional Bldg, Mississauga, ON* – G. Wu, D. Kim, G. Wong, J. Wadgymar; *Chinook Regional Health Authority, Lethbridge, AB* – M. Wong, R. Schuld. **Czech Republic**, *Masarykova nemocnice Nefrologicko-dialyzacni oddeleni, Usti nad Labem* – Z. Bitterova, T. Hanek; *Fresenius Medical Care-DS s.r.o., Pardubice* – K. Dvorak, Z. Pavlikova; *Fakultni nemocnice Hradec Kralove, Hradec Kralove* – P. Fixa, J. Zahradnik; *Nemocnice Tabor, Tabor* – J. Suchanova, E. Krizova; *Vseobecná fakultni nemocnice, I. interni klinika, Prague* – V. Tesar, J. Zavada, J. Lachmanova, M. Mokrejsova; *IKEM, Nefrologické odd., HDS, Prague* – O. Viklicky, L. Lyerova, M. Urbanova, P. Syrovatka, S. Kukura; *VFN, Interni oddeleni Strahov, Prague* – F. Svara, M. Sagova, S. Sulkova, V. Polakovic; *Nemocnice Liberec, Liberec* – M. Ryba, P. Koci. **Denmark**, *Rigshospitalet, Copenhagen* – S. Ladefoged, H. Jensen; *Frederiksberg Hospital, Frederiksberg* – S. Ladefoged; H. Jensen; *Roskilde Sygehus, Roskilde* – K. Rasmussen, G. Nielsen, O. Østergaard; *Herlev Hospital, Herlev* – A. Nielsen, F. Lynggaard; *Fredericia Sygehus, Fredericia* – K. Otte, G. Steffensen; *Horsens Sygehus, Horsens* – K. Otte, G. Steffensen; *Holbæk Sygehus, Holbæk* – N-J. Løkkegaard; *Sygehus Syd Slagelse, Slagelse* – N-J. Løkkegaard; *Viborg-Kjellerup Sygehus, Viborg* – H. Danielsen, C. Hasling; *Sønderborg Sygehus, Sønderborg* – S. Hansen, P. Freese; *Bornholms Centralsygehus, Rønne* – J. Hansen, E. Rasmussen, F. Nielsen, M. Egfjord, W. Szpirt. **Finland**, *TAYS Dialyysiosasto, Tampere* – J. Mustonen, H. Saha, I. Ala-Houhala; *HYKS, Kirurginen sairaala, Helsinki* – C. Grönhagen-Riska, A. Ekstrand, E. Honkanen, K. Ylinen, R. Malmström, V. Rauta; *TYKS Dialyysiosasto, Turku* – R. Terti, K. Metsärinne, M. Heiro, N. Koivuviita; *OYS Munuaisosasto, Oulu* – K. Kananen, A. Salmela, P. Lepistö, R. Ikäheimo, S. Pikkujämsä; *KYS, Dialyysiosasto, Kuopio* – P. Karhapää, A. Lumiaho, A. Pulkkinen, R. Ikäheimo; *Päijät-Hämeen keskusairaala, Lahti* – A. Helanterä, M. Wallin, M. Kolunen; *Satakunnan keskussairaala, Pori* – M. Asola, J. Huhti; *Pohjois-Karjalan keskussairaala, Joensuu* – K. Jääskeläinen, J. Nuortimo; *Kymenlaakson keskussairaala, Kotka* – M. Stenborg, J. Erkinheimo, M. Huuskonen, R. Paldanius; *Hyvinkään sairaala, Hyvinkää* – K. Helin, L. Norvio; *Länsi-Uudenmaan sairaala, Tammisaari* – M. Haapala, C-J. Lindström. **France**, *CH St Fiacre, Meaux* – R. Monkam; *CH Duchenne, Boulogne-sur-Mer* – P. Bataille, D. Nour, M. Bouzerjnidj, P. Wheatley, S. Billion; *H Louis Pasteur, Colmar* – P. Brignon, M. Maaz; *H Bicetre, Kremelin Bicetre* – B. Charpentier, A. Durrbach, R. Djefal, R. Snanoudj; *H Sud Amiens, Amiens* – N. El Esper, G. Choukroun; *H Paul Egine, Champigny Sur Marne* – D. Dahmane, H. Fessi; *H Brabois, Vandoeuvre Les Nancy* – M. Kessler, M. Bellou-Zerrouki, T. Cao-Huu; *Clinique Nephrologique du Pont Allant, Maubeuge* – C. Lamotte, J. Lebleu; *Service de Dialyse 42 bd Jourdan, Paris* – C-N. Luong, B. Bouali, I. Reach; *Service d'Hémodialyse Rue Delbecque, Bethune* – E. Mac-Namara, F. Bourdon; *CH Général,*

Evreux – G. Majdanali, A. Bouffandeau, B. Chaghouri, V. Hugot; *Clinique du Landy Service Hémodialyse Néphrologie, Saint-Oeun* – P. A. U. Torres; *H Nouvel, Valenciennes* – R. Binaut, D. Fleury, J-L. Bacri, N. Maisonneuve, P. Vanhille, V. Lemaitre; *Centre Hospitalier de Beauvais, Beauvais* – G. Lambrey; *AGDUC Service de Néphrologie, Montbonnot Saint Martin* – P. Zaoui, F. Kuentz, P. Palancin, R. Milongo, T. Hachache; *Centre Hospitalier du Val d'Ariege, Foix* – F. Dehais, P. Dupuy; *Chi De Cornouailles, Quimper* – B. Wehbe, S. Benarbia; *Hopital De Girac, Saint Michel* – L. Yver, M. Pujó; *Centre Hospitalier, Chambéry* – J. Fourcade, J-B. Philit. **Germany**, *Dialyse und Gemeinschaftspraxis, Kaufbeuren* – C. Ballé; *Dialysepraxis, Homburg/Saar* – R. Bambauer; *Dialysepraxis, Ansbach* – K. Bittner; *KfH Kuratorium für Dialyse und Nierentransplantation, Aschaffenburg* – G-P. Dragoun; *Nephrologische Praxisklinik im Medical Center, Münster* – F. Matzkies; *Dialyse-Praxis, Saarbrücken* – H. Hartmann; *Dialysepraxis, Menden* – H-D. Hoffmann; *Nephrologisches Zentrum Niedersachsen, Hann. Münden* – V. Kliem; *KfH Kuratorium für Dialyse und Nierentransplantation, Greifswald* – U. Kraatz, G. Kraatz; *Dialysepraxis, Bad Münde* – H. Krämer; *Dialyse-Praxis, Pirmasens* – W. Krämer; *Dialyse-Praxis, Freiburg* – A. Krämer-Guth; *Dialyse-Praxis, Tangermünde* – R. Kühn; *Praxis, Marktheidenfeld* – P. Kulzer; *Dialysezentrum, Waldshut* – C. Kurth; *Dialysezentrum, Regensburg* – R. Liebl; *Dialysezentrum, Dormagen* – L. Merker; *Dialysezentrum, Bad Nauheim* – T. Meyer; *Internistische Nephrologische Praxis, Lüdenscheid* – C. Mohler; *Otto-von-Guericke Universität, Magdeburg* – K. Neumann; *Praxis, Fürth* – J. Nikolay; *Klinikum Ingolstadt, Ingolstadt* – E. Reiter; *Praxis, Pfarrkirchen* – G. Schannen; *KfH Kuratorium für Dialyse und Nierentransplantation, Munich* – J. Scherberich; *University Hospital, Erlangen-Nürnberg* – R. Schmieder; *Universitätsklinikum Friedrich-Schiller-Universität, Jena* – H. Sperschneider; *Dialysepraxis, Duisburg* – J. Wagner; *Praxis, Leipzig* – I. Bast; *Praxis, Bischofswerda* – K. Anding-Rost; *Universitätsklinik an der TU, Dresden* – J. Passauer; *KfH Kuratorium für Dialyse und Nierentransplantation, Frankfurt* – E. Scheuermann; *KfH Kuratorium für Dialyse und Nierentransplantation, Berlin* – R-D. Krause; *Vivantes Humbolt-Klinikum, Berlin* – W. Pommer. **Great Britain**, *Hull Royal Infirmary, Hull* – S. Bhandari, A. Webb, D. Lewis, D. Eadington, H. Collinson, L. Sellars, P. Svreck; *Freeman Hospital, Newcastle* – A. Brown, A. Bow, S. Ahmed; *Ninewells Hospital, Dundee* – A. Severn, I. Henderson; *Western Infirmary, Glasgow* – A. Jardine, B. Junor, C. Nolan, C. Geddes, E. McGregor, P. Mark, R. Patel, S. Rodger; *James Cook University Hospital, Middlesborough* – J. Main, D. Reaich, A. Paterson; *Belfast City Hospital, Belfast* – P. Maxwell, H. Brown, M. Finn; *Hope Hospital, Manchester* – D. O'Donoghue, G. Wood, O. Espinosa, R. Middleton; *St James University Hospital, Leeds* – G. Woodrow, M. Wright; *Derriford Hospital, Plymouth* – P. Rowe, H. Cramp, W. Tse; *Glasgow Royal Infirmary, Glasgow* – J. Fox, R. Macteir; *Dumfries & Galloway Royal Infirmary, Dumfries* – C. Isles; *St. Georges Hospital, London* – C. Streater, D. Semple, D. Banerjee; *Manchester Royal Infirmary, Manchester* – S. Mitra, R. Gokal, A. Bibtana, A. Asari; *Bradford Royal Infirmary, St Luke's Hospital, Bradford* – R. Jeffrey, R. Mumtaz; *Northern General Hospital, Sheffield Kidney Institute, Sheffield* – M. El Nahas; *St Helier*

*Hospital, Carshalton* – J. Kwan; *Glan Clwyd Hospital, Rhyl* – M. Kumwenda, A. Douglas; *Antrim Area Hospital, Antrim* – C. Harron, A. Courtney, H. Brown, J. Sunil; *Tyrone County Hospital, Omagh* – P. Garrett, N. Maddekar, E. Bergin; *Daisy Hill Hospital, Newry* – J. Harty, B. Conway, M. Hollywood; *Crosshouse Hospital, Kilmarnock* – M. Macgregor, P. Mackenzie.

**Greece**, *Red Cross Hospital, Athens* – N. Papagalanis, D. Biblaki, G. Ntatsis, N. Kaperonis, V. Siapera; *Nikaia General Hospital, Athens* – C. Iatrou, T. Kontouli, E. Spanou, P. Kalocheritis, S. Zerbala, S. Sofroniadou; *General Hospital of Veria*, – D. Tsakiris, A. Kelesidis, K. Xanthopoulou, I. Tsouchnikas, S. Papakonstantinou; *Papanikolaou Hospital, Thessaloniki* – K. Sobolos, G. Bamichas; *University Hospital of Ioannina, Ioannina* – K. Siamopoulos, C. Gouva, A. Kitsos, K. Katopodis, P. Nikolopoulos; *University Hospital of Alexandroupoli, Alexandroupoli* – V. Vargemezis, E. Thodis, E. Yannatos, K. Kantartzi, S. Panagoutsos.

**Hungary**, *SzTE Diaverum, Szeged* – S. Sonkodi, É. Kiss, M. Zsom; *Eurocare-1, Tétényi, Budapest* – I. Kiss, A. Lakatos, E. Fodor, É. Nádori; *FMC Dialízis Center, Budapest* – O. Árkossy, L. Koroknai, R. Mázik; *Gambro-Dialízis, Honvéd Kh., Budapest* – Z. Vezekényi, A. Kovács, N. Samir; *Eurocare-3, Veszprém* – K. Akócsi, G. Varga; *Eurocare-11, Győr* – S. Ferenczi, B. Villányi, K. Schneider, S. Vinkovits, Z. Czégány, Z. Ónody; *Eurocare-2 Nyháza, Nyíregyháza* – J. Szegedi, F. Valikovics, S. Angyal, Z. Zilahi; *Fresenius, Miskolc* – E. Ladányi, J. Széll; *Fresenius, SE I. Belklinika, Budapest* – K. Berta, B. Szamosfalvi, C. Ambrus, G. Deák, M. Faludi, M. Molnár; *Eurocare-9, Székesfehérvár* – G. Zakar, D. Varga, L. Kovács, Z. Tüsér.

**Iceland**, *IS Landspítalinn, Nyrnadeild, Reykjavík* – M. Bodvarsson, M. Arnadóttir.

**Ireland**, *Merlin Park Hospital, Galway* – D. Redden, A. Mutwali, B. Griffin, C. Lenihan, C. O'Seaghda, D. Lappin, M. Gafney, M. Akram.

**Italy**, *Ospedale Riuniti, Bergamo* – G. Remuzzi, D. Marchesi, G. Mingardi; *Ospedale Di Circolo, Busto Arsizio* – P. Allaria, A. Giangrande, A. Lucatello, F. Caligara, L. Angelo; *Università Degli Studi Di Genova, Genova* – G. Deferrari, C. Robaudo, F. Lauria; *Ospedale Maggiore, Lodi* – E. Imbasciati, F. Barbisoni, M. Farina, M. Maggio, S. Borlandelli; *Istituto Clinico "Humanitas", Rozzano* – S. Badalamenti, S. Finazzi, C. Angelini; *Ospedale S. Raffaele, Milan* – G. Bianchi, D. Spotti, R. Quartagno; *Istituti Ospitalieri - Cremona* – F. Malberti, A. La Russa, P. Pecchini, P. Ghiringhelli; *Azienda Ospedaliera Bianchi Melacrino Morelli, Calabria* – C. Zoccali, D. Delfino, F. Mallamaci, F. Marino, G. Curatola, G. Caridi, M. Ciccarelli; *Ospedale Di Treviglio Caravaggio, Treviglio* – M. Borghi, M. Tagliaferri, M. Massazza.

**Mexico**, *Hospital Médica Sur, Mexico City* – B. Espinoza; *Hospital Dalinde, Mexico City* – M. Torres; *Hospital Regional "Adolfo López Mateos" ISSSTE, Mexico City* – E. López; *Hospital General de Zona No. 110, IMSS, Guadalajara* – J. L. Montañez; *Fresenius Medical Care, Cuernavaca* – T. Bochicchio; *Hospital Universitario, Monterrey* – J. Cruz; *Hospital Central "Dr Ignacio Morones Prieto", San Luis Potosí* – A. Chevaile, L. Cordero.

**The Netherlands**, *Jeroen Bosch Ziekenhuis, Den Bosch* – J. Beutler, A. Hollander, E. Hoogeveen, M. Koolen; *Sint Antoniusziekenhuis, Nieuwegein* – W. Bos, H. Endeman, H. Vincent, T. Geers; *Sint Elisabeth Ziekenhuis, Tilburg* – P. Rensma, A. Apperloo, R. Haest; *Medisch Centrum Rijnmond-Zuid, Rotterdam* – P. Van De Ven, R. Alphen; *HAGA Ziekenhuis, locatie Leyenburg, The Hague* –

M. Van Buren, G. Essen; *Twenteborg Ziekenhuis, Almelo* – A. Woittiez, A. Ouwehand; *HAGA Ziekenhuis, locatie Rode Kruis, The Hague* – L. Vleming, M. Krol-Van Stratten; *Martini Ziekenhuis, Groningen* – W. Janssen, T. Kremer Horinga, W. Kloppenburg; *Deventer Ziekenhuis, Deventer* – C. Doorenbos, H. Sluiter; *Albert Schweitzer Ziekenhuis, Dordrecht* – P. Smak-Gregoor, E. Van Bommel, J. Jongh; *Maasland Ziekenhuis, Sittard* – G. Verseput; *Meander Medisch Centrum, Amersfoort* – E. Hagen, A. Stork, C. Gaillard, M. Pondman; *Medisch Centrum Alkmaar, Alkmaar* – W. Bax, J. Van Geelen; *Sint Franciscus Gasthuis, Rotterdam* – Y. Schrama, A. Rietveld, C. Op De Hoek, P. Diderich; *Rijnstate Ziekenhuis, Arnhem* – H. Kaasjager, F. Bosch, L. Reichert; *Medisch Centrum Leeuwarden Zuid, Leeuwarden* – M. Hemmelder, C. Halma, J. Broekroelofs; *Scheper Ziekenhuis, Emmen* – W. Haanstra, G. Vastenburger; *Onze Lieve Vrouwe Gasthuis, Amsterdam* – C. De Fijter, J. Groeneveld. **Norway**, *Helse Stavanger HF Sykehuset, Stavanger* – H. Bergrem; *Sykehuset Innlandet HF Lillehammer, Lillehammer* – L. Thorud; *Rikshospitalet HF, Oslo* – H. Holdaas, E. Hagen; *Ullevål universitetssykehus HF, Oslo* – H. Viko, J. Eggesbø; *Akershus universitetssykehus HF, Lørenskog* – C. Halvorsen; *Sykehuset Østfold HF Fredrikstad, Fredrikstad* – O. Hunderi; *Sykehuset Vestfold HF Tønsberg, Tønsberg* – S. Abedini; *Sykehuset Telemark HF Skien, Skien* – L. Broch, K. Heldal, P. Lyngdal; *Helse Bergen HF Haukeland universitetssykehus, Bergen* – B. Iversen; *St. Olavs Hospital HF, Trondheim* – C. Øien; *Sykehuset Buskerud HF Drammen, Drammen* – K. Selvig. **Poland**, *Klinika Nefrologii, Endokrynologii i Chorób Przemiany, ul. Francuska 20, Katowice* – A. Więcek, J. Witkiewicz, U. Spiechowicz-Zatoń, W. Marcinkowski; *ul. Jaczewskiego 8, Lublin* – A. Książek, I. Baranowicz-Gąszczyk, L. Józwiak; *Stacja Dializ Wojewódzki Szpital Specjalistyczny, ul. Energetyków 46, Rybnik* – M. Kuczera, J. Szweblík, J. Bieńkowski, J. Wajda; *Oddziału Nefrologii, ul. Witosa 26, Opole* – G. Bogdanowicz, J. Jaworska-Wieczorek; *Klinika Nefrologii i Chorób Wewnętrznych, ul. Żurawia 14, Białystok* – M. Myśliwiec, M. Barczyk, M. Kalinowski, M. Mazerska, W. Trusewicz; *Oddziału Nefrologii i Dializoterapii, ul. Wieniecka 49, Włocławek* – J. Ostrowski, E. Błaszczuk, I. Majczyńska, J. Kazimierzczak, J. Kaćki, P. Kochman; *Nefrologia ul. Debinki 7, Gdansk* – B. Rutkowski, B. Białobrzaska, M. Jankowska, M. Chmielewski, Z. Zdrojewski, A. Dębska-Ślizień; *Oddziału Nefrologicznego, ul. Medyczna 19, Płock* – M. Świtalski, A. Kęпка, D. Szewczyk, J. Fusik, M. Kuriga, M. Ostrowski, T. Myszta; *Klinika Nefrologiczna, ul. Kopernika 15c, Kraków* – W. Sułowicz, A. Radziszewski, B. Walatek, I. Kaczmarczyk, M. Drożdż, M. Piotrowska, M. Kraśnicka, P. Koźmiński, S. Pawłowska; *ul Katowicka 64, Opole* – H. Żygadło, I. Zalańska. **Republic of Korea**, *Seoul National University Bundang Hospital, Seongnam* – D-W. Chae, H. Jin, S. Kim, Y. Song, K-Y. Na; *Hallym University Kangdong Sacred Heart Hospital, Seoul* – J-E. Oh, K. H. Oh, J-E. Oh; *Samsung Medical Centre, Seoul* – Y-G. Kim, B. Kim, H-J. Baek, J-A. Kim, Y. Song, Y. J. Lee; *St. Mary's Hospital, Seoul* – Y-S. Chang, C. W. Park, H-W. Chung, S. Han; *Kangnam St. Mary's Hospital, Seoul* – Y-S. Kim, J-A. Park, B-S. Choi, H. E. Yoon, H. Hwang, J-M. Yoon, J-Y. Kim, S-W. Han, S. Kim; *Hanyang University Hospital, Seoul* – C-M. Kang, C-W. Lee, G-H. Kim, N-W. Choi; *KyeongHee*

*University Medical Centre, Seoul* – C-G. Ihm, K-H. Jeong, M-J. Kim, S-H. Lee, T-W. Lee.

**Sweden**, *Akademiska sjukhuset, Medicincentrum/Njurmedicinska, Uppsala* – B. Wikström, B. Fellström, T. Linde, U. Nisbeth; *Norra Älvsborgs Länssjukhus, Medicinkliniken, Trollhättan* – H. Mulec, M. Kronvall; *Länssjukhuset Ryhov, Medicinkliniken, Jönköping* – C. Frisenette-Fich, A. Ståhl Nilsson, N-J. Mauritz, S. Schirdewan; *SU/Sahlgrenska Univ. Sjukhus, Göteborg* – O. Samuelsson, G. Stelin, P. Ottosson; *Kärnsjukhuset, Medicinkliniken, Skövde* – B. Stefansson, B. Ramsauer, D. Hultström, H. Hadimeri; *Vrinnevisjh, Medicinkliniken, Norrkköping* – P-O. Andersson, H. Al Magdasi; *Centralsjukhuset, Njurmedicinkliniken, Karlstad* – L. Weiss, G. Welander; *Mälarsjukhuset, Njurmedicinska kliniken, Eskilstuna* – K. C. Gröntoft, L. Zezina; *Höglandssjukhuset, Medicinkliniken, Eksjö* – H. Hadimeri, L. Svensson; *Universitetssjukhuset, Njursektionen, Lund* – A. Fagerström, U. Lund; *Universitetssjukhuset Medicinkliniken/dialysen, Örebro* – M. Tidman, C. Lundin, P. Sjöström; *Gävle sjukhus, Medicinkliniken, Gävle* – P. Wessén, P. Halvarsson, U. Wrege; *Falu Lasarett, Njurmottagningen/Medicin, Falu* – M. Linder, A. Ekspong; *SU/Möln dal, Njurmedicin, Möln dal* – G. Jensen, G. Stelin, A. Alfredsson; *Karolinska Universitetssjukhuset, Stockholm* – E. Löfberg; *Universitetssjukhuset, Linköping* – G. Almroth, M. Haarhaus; *Lundby Sjukhus, Göteborg* – K. Gisslén, Ö. Mathillas. **Switzerland**, *Kantonsspital, Aarau* – A. Bock; *Centre Hospitalier Universitaire Vaudois CHUV, Lausanne* – M. Burnier; *Kantonsspital, St. Gallen* – I. Binet, D. Tsinalis; *Universitätsspital, Zürich* – R. Wüthrich. **Turkey**, *Ethics Committee Ege Universitesi Tip Fakultesi Erik Kurulu, Izmir* – A. Basci; *Akdeniz University Medical Faculty, Antalya* – G. Süleymanlar; *Hacettepe University, Ankara* – C. Turgan; *Ankara Training and Research Hospital, Ankara* – M. Duranay; *Ankara University Medical Faculty, Ankara* – G. Nergizoglu; *Uludag University Medical Faculty, Bursa* – M. Gullulu; *Haydarpasa Numune Training and Research Hospital, Haydarpasal* – F. Turkmen.

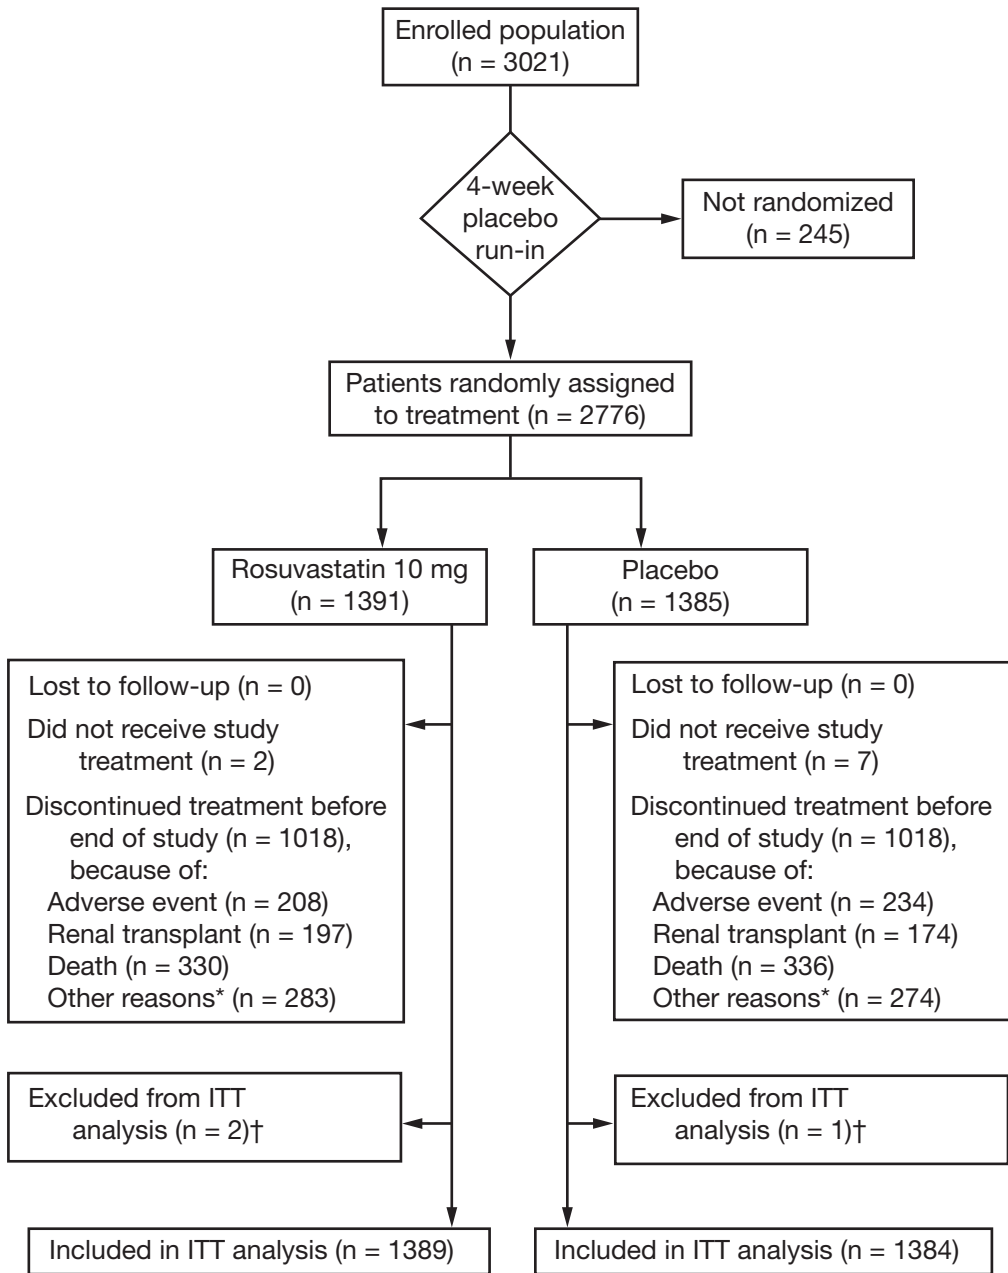

\*Includes patients not willing to continue treatment, those that developed study-specific discontinuation criteria, and patients for whom no specific reason for discontinuation was given

†These patients were excluded from the ITT analysis because they were incorrectly randomized
